# Supplementary material for: Association of Preoperative Chemosensitivity With Postoperative Survival in Patients With Resected Gastric Adenocarcinoma
Source: PubMed Central journal article supplement (PMC8605482; doi:10.1001/jamanetworkopen.2021.35340), 2021-11-19
Supplement: jamanetwopen-e2135340-s001.pdf [file jamanetwopen-e2135340-s001.pdf]

## Supplemental Online Content

Deng L, Groman A, Jiang C, et al. Association of preoperative chemosensitivity with postoperative survival in patients with resected gastric adenocarcinoma. *JAMA Netw Open*. 2021;4(11):e2135340. doi:10.1001/jamanetworkopen.2021.35340

**eFigure.** Flowchart of Study

**eTable 1.** Logistic Regression Model for Receiving Postoperative Chemotherapy

**eTable 2.** Univariable and Multivariable Cox Regression Models for Survival Without Interaction Effects

**eTable 3.** Patient Characteristics by Preoperative Chemosensitivity and Postoperative Chemotherapy

**eTable 4.** Cox Model of Overall Survival with Interaction Effect of Preoperative Chemosensitivity and Postoperative Chemotherapy

**eTable 5.** Association of Survival in Patients Treated With Postoperative Chemotherapy or Not by yp Nodal Status

This supplemental material has been provided by the authors to give readers additional information about their work.

eFigure. Flowchart of Study

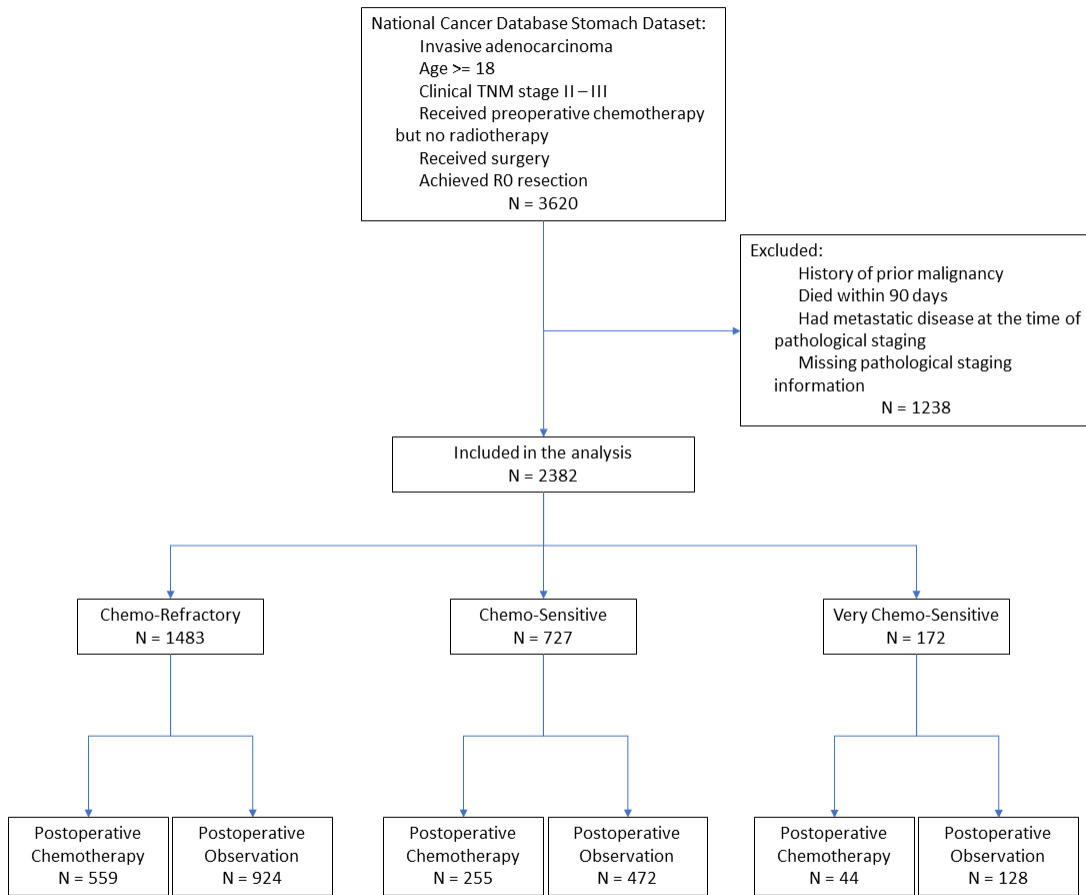

eTable 1. Logistic Regression Model for Receiving Postoperative Chemotherapy

| <b>Variables</b>                                                 | <b>OR<sup>1</sup></b> | <b>95% CI<sup>1</sup></b> | <b>p-value</b>   |
|------------------------------------------------------------------|-----------------------|---------------------------|------------------|
| <b>Age (continuous)</b>                                          | 0.99                  | 0.97 - 1.00               | <b>0.018</b>     |
| <b>Race</b>                                                      |                       |                           | 0.721            |
| <i>White</i>                                                     | —                     | —                         |                  |
| <i>Black</i>                                                     | 0.91                  | 0.68 - 1.21               |                  |
| <i>Other</i>                                                     | 1.05                  | 0.78 - 1.43               |                  |
| <b>Sex</b>                                                       |                       |                           | 0.303            |
| <i>Female</i>                                                    | —                     | —                         |                  |
| <i>Male</i>                                                      | 1.12                  | 0.90 - 1.40               |                  |
| <b>Insurance</b>                                                 |                       |                           | 0.724            |
| <i>Uninsured</i>                                                 | —                     | —                         |                  |
| <i>Government</i>                                                | 0.91                  | 0.52 - 1.61               |                  |
| <i>Private</i>                                                   | 1.00                  | 0.58 - 1.75               |                  |
| <b>Treating Facility</b>                                         |                       |                           | 0.16             |
| <i>Academic/Integrated</i>                                       | —                     | —                         |                  |
| <i>Community</i>                                                 | 1.19                  | 0.93 - 1.52               |                  |
| <b>Year of Diagnosis (continuous)</b>                            | 1.03                  | 0.99 - 1.08               | 0.175            |
| <b>Comorbidity</b>                                               |                       |                           | <b>0.004</b>     |
| <i>No Comorbidity</i>                                            | —                     | —                         |                  |
| <i>Has Comorbidity</i>                                           | 0.71                  | 0.57 - 0.90               |                  |
| <b>Grade</b>                                                     |                       |                           | 0.103            |
| <i>I/II</i>                                                      | —                     | —                         |                  |
| <i>III/IV</i>                                                    | 1.21                  | 0.96 - 1.53               |                  |
| <b>Clinical TNM Stage</b>                                        |                       |                           | 0.172            |
| <i>II</i>                                                        | —                     | —                         |                  |
| <i>III</i>                                                       | 1.16                  | 0.94 - 1.45               |                  |
| <b>Days from Chemotherapy Initiation to Surgery (continuous)</b> | 0.99                  | 0.99 - 1.00               | <b>&lt;0.001</b> |
| <b># of Nodes Examined</b>                                       |                       |                           | 0.153            |
| <i>&lt;15</i>                                                    | —                     | —                         |                  |
| <i>15</i>                                                        | 1.20                  | 0.94 - 1.53               |                  |
| <b>Preoperative Chemosensitivity</b>                             |                       |                           | <b>0.041</b>     |
| <i>Refractory</i>                                                | —                     | —                         |                  |

|                                                      |      |             |                  |
|------------------------------------------------------|------|-------------|------------------|
| <i>Sensitive</i>                                     | 0.96 | 0.76 - 1.20 |                  |
| <i>Very Sensitive</i>                                | 0.58 | 0.37 - 0.89 |                  |
| <b>Days of Surgical Hospitalization (continuous)</b> | 0.95 | 0.93 - 0.97 | <b>&lt;0.001</b> |
| <b>Unplanned 30-day Readmission</b>                  |      |             | 0.58             |
| <i>No</i>                                            | —    | —           |                  |
| <i>Yes</i>                                           | 0.87 | 0.53 - 1.40 |                  |

<sup>1</sup> OR = Odds Ratio, CI = Confidence Interval

eTable 2. Univariable and Multivariable Cox Regression Models for Survival Without Interaction Effects

| Variables                                                                     | Univariable  |                  | Multivariable |                  |
|-------------------------------------------------------------------------------|--------------|------------------|---------------|------------------|
|                                                                               | Hazard Ratio | p value          | Hazard Ratio  | p value          |
| <b>Age (continuous)</b>                                                       | 1.00         | 0.201            | 1.00          | 0.158            |
| <b>Race</b>                                                                   |              |                  |               |                  |
| <i>White</i>                                                                  | Reference    |                  |               |                  |
| <i>Black</i>                                                                  | 0.69         | <b>&lt;0.001</b> | 0.84          | <b>0.102</b>     |
| <i>Other</i>                                                                  | 0.51         | <b>&lt;0.001</b> | 0.58          | <b>&lt;0.001</b> |
| <b>Male vs. Female</b>                                                        | 1.06         | 0.370            | —             | —                |
| <b>Insurance</b>                                                              |              |                  | —             | —                |
| <i>Uninsured</i>                                                              | Reference    |                  |               |                  |
| <i>Government</i>                                                             | 1.00         | 0.987            |               |                  |
| <i>Private</i>                                                                | 0.91         | 0.596            |               |                  |
| <b>Community vs. Academic/Integrated Program</b>                              | 1.07         | 0.340            | —             | —                |
| <b>Year of diagnosis (continuous)</b>                                         | 0.93         | <b>&lt;0.001</b> | 0.94          | <b>&lt;0.001</b> |
| <b>Has vs. No Comorbidity</b>                                                 | 1.05         | 0.510            | 1.10          | 0.236            |
| <b>Tumor Grade III/IV vs. II/I</b>                                            | 1.58         | <b>&lt;0.001</b> | 1.59          | <b>&lt;0.001</b> |
| <b>Clinical TNM stage III vs. II</b>                                          | 1.35         | <b>&lt;0.001</b> | 1.63          | <b>&lt;0.001</b> |
| <b>Days from initiating preoperative Chemotherapy to Surgery (continuous)</b> | 1.00         | 0.370            | 1.00          | 0.708            |
| <b>≥ 15 vs. &lt; 15 Regional Lymph Nodes Examined</b>                         | 0.83         | <b>0.006</b>     | 0.76          | <b>&lt;0.001</b> |
| <b>Preoperative Chemosensitivity</b>                                          |              |                  |               |                  |
| <i>Refractory</i>                                                             | Reference    |                  |               |                  |
| <i>Sensitive</i>                                                              | 0.42         | <b>&lt;0.001</b> | 0.39          | <b>&lt;0.001</b> |
| <i>Very Sensitive</i>                                                         | 0.17         | <b>&lt;0.001</b> | 0.12          | <b>&lt;0.001</b> |
| <b>Days of Surgical Hospitalization (continuous)</b>                          | 1.01         | <b>&lt;0.001</b> | 1.01          | <b>&lt;0.001</b> |
| <b>Unplanned vs. No Unplanned 30-day Readmission</b>                          | 1.11         | 0.490            | —             | —                |
| <b>Postoperative Chemotherapy vs. None</b>                                    | 0.94         | 0.370            | 0.88          | 0.091            |

eTable 3. Patient Characteristics by Preoperative Chemosensitivity and Postoperative Chemotherapy

| Characteristic          | Very Sensitive                        |                                   |                      | Sensitive                             |                                    |                      | Refractory                            |                                    |                      |
|-------------------------|---------------------------------------|-----------------------------------|----------------------|---------------------------------------|------------------------------------|----------------------|---------------------------------------|------------------------------------|----------------------|
|                         | No Chemotherapy, N = 128 <sup>1</sup> | Chemotherapy, N = 44 <sup>1</sup> | p-value <sup>2</sup> | No Chemotherapy, N = 472 <sup>1</sup> | Chemotherapy, N = 255 <sup>1</sup> | p-value <sup>2</sup> | No Chemotherapy, N = 924 <sup>1</sup> | Chemotherapy, N = 559 <sup>1</sup> | p-value <sup>2</sup> |
| <b>Age (Year)</b>       |                                       |                                   | <b>0.015</b>         |                                       |                                    | <b>&lt;0.001</b>     |                                       |                                    | <b>0.001</b>         |
| <65                     | 63 (49%)                              | 31 (70%)                          |                      | 229 (49%)                             | 159 (62%)                          |                      | 496 (54%)                             | 348 (62%)                          |                      |
| 65                      | 65 (51%)                              | 13 (30%)                          |                      | 243 (51%)                             | 96 (38%)                           |                      | 428 (46%)                             | 211 (38%)                          |                      |
| <b>Sex</b>              |                                       |                                   | 0.684                |                                       |                                    | 0.798                |                                       |                                    | 0.665                |
| <i>Female</i>           | 30 (23%)                              | 9 (20%)                           |                      | 145 (31%)                             | 76 (30%)                           |                      | 322 (35%)                             | 201 (36%)                          |                      |
| <i>Male</i>             | 98 (77%)                              | 35 (80%)                          |                      | 327 (69%)                             | 179 (70%)                          |                      | 602 (65%)                             | 358 (64%)                          |                      |
| <b>Race</b>             |                                       |                                   | 0.534                |                                       |                                    | 0.392                |                                       |                                    | <b>0.003</b>         |
| <i>White</i>            | 100 (78%)                             | 33 (75%)                          |                      | 321 (68%)                             | 183 (72%)                          |                      | 665 (72%)                             | 382 (68%)                          |                      |
| <i>Black</i>            | 15 (12%)                              | 8 (18%)                           |                      | 81 (17%)                              | 34 (13%)                           |                      | 153 (17%)                             | 78 (14%)                           |                      |
| <i>Other</i>            | 13 (10%)                              | 3 (6.8%)                          |                      | 70 (15%)                              | 38 (15%)                           |                      | 106 (11%)                             | 99 (18%)                           |                      |
| <b>Diagnosis Period</b> |                                       |                                   | 0.465                |                                       |                                    | 0.408                |                                       |                                    | 0.305                |
| <i>2006-2011</i>        | 28 (22%)                              | 12 (27%)                          |                      | 151 (32%)                             | 74 (29%)                           |                      | 281 (30%)                             | 156 (28%)                          |                      |
| <i>2012-2017</i>        | 100 (78%)                             | 32 (73%)                          |                      | 321 (68%)                             | 181 (71%)                          |                      | 643 (70%)                             | 403 (72%)                          |                      |
| <b>Insurance</b>        |                                       |                                   | 0.051                |                                       |                                    | 0.161                |                                       |                                    | <b>&lt;0.001</b>     |
| <i>Uninsured</i>        | 3 (2.4%)                              | 2 (4.5%)                          |                      | 15 (3.2%)                             | 10 (4.0%)                          |                      | 29 (3.2%)                             | 22 (4.0%)                          |                      |
| <i>Government</i>       | 66 (52%)                              | 14 (32%)                          |                      | 249 (54%)                             | 117 (46%)                          |                      | 483 (53%)                             | 223 (41%)                          |                      |
| <i>Private</i>          | 58 (46%)                              | 28 (64%)                          |                      | 198 (43%)                             | 125 (50%)                          |                      | 394 (43%)                             | 305 (55%)                          |                      |
| (Missing)               | 1                                     | 0                                 |                      | 10                                    | 3                                  |                      | 18                                    | 9                                  |                      |

|                                                     |              |              |              |               |              |                  |               |              |                  |
|-----------------------------------------------------|--------------|--------------|--------------|---------------|--------------|------------------|---------------|--------------|------------------|
| <b>Treating Facility</b>                            |              |              | 0.821        |               |              | 0.702            |               |              | 0.279            |
| <i>Academic/Integrated</i>                          | 88 (69%)     | 29 (67%)     |              | 338 (74%)     | 178 (73%)    |                  | 671 (76%)     | 384 (74%)    |                  |
| <i>Community</i>                                    | 39 (31%)     | 14 (33%)     |              | 117 (26%)     | 66 (27%)     |                  | 207 (24%)     | 136 (26%)    |                  |
| (Missing)                                           | 1            | 1            |              | 17            | 11           |                  | 46            | 39           |                  |
| <b>Comorbidity</b>                                  |              |              | <b>0.026</b> |               |              | 0.122            |               |              | <b>0.004</b>     |
| <i>No Comorbidity</i>                               | 85 (66%)     | 37 (84%)     |              | 324 (69%)     | 189 (74%)    |                  | 652 (71%)     | 433 (77%)    |                  |
| <i>Has Comorbidity</i>                              | 43 (34%)     | 7 (16%)      |              | 148 (31%)     | 66 (26%)     |                  | 272 (29%)     | 126 (23%)    |                  |
| <b>Grade</b>                                        |              |              | 0.585        |               |              | 0.131            |               |              | 0.175            |
| <i>I/II</i>                                         | 33 (33%)     | 11 (28%)     |              | 162 (37%)     | 74 (31%)     |                  | 212 (25%)     | 113 (22%)    |                  |
| <i>III/IV</i>                                       | 67 (67%)     | 28 (72%)     |              | 272 (63%)     | 161 (69%)    |                  | 638 (75%)     | 407 (78%)    |                  |
| (Missing)                                           | 28           | 5            |              | 38            | 20           |                  | 74            | 39           |                  |
| <b>Clinical TNM Stage</b>                           |              |              | 0.774        |               |              | 0.326            |               |              | 0.697            |
| <i>II</i>                                           | 73 (57%)     | 24 (55%)     |              | 242 (51%)     | 121 (47%)    |                  | 642 (69%)     | 383 (69%)    |                  |
| <i>III</i>                                          | 55 (43%)     | 20 (45%)     |              | 230 (49%)     | 134 (53%)    |                  | 282 (31%)     | 176 (31%)    |                  |
| <b>Days from Chemotherapy Initiation to Surgery</b> | 98 (89, 114) | 97 (85, 102) | 0.086        | 101 (88, 123) | 97 (85, 108) | <b>&lt;0.001</b> | 100 (85, 119) | 95 (82, 111) | <b>&lt;0.001</b> |
| (Missing)                                           | 6            | 0            |              | 32            | 8            |                  | 88            | 20           |                  |
| <b># of Nodes Examined</b>                          |              |              | 0.344        |               |              | 0.052            |               |              | 0.303            |
| <i>&lt;15</i>                                       | 42 (33%)     | 11 (26%)     |              | 148 (32%)     | 62 (25%)     |                  | 219 (24%)     | 119 (22%)    |                  |
| <i>15</i>                                           | 84 (67%)     | 32 (74%)     |              | 320 (68%)     | 189 (75%)    |                  | 696 (76%)     | 432 (78%)    |                  |

|                                                                                      |                |                |       |                 |                |              |           |           |                  |
|--------------------------------------------------------------------------------------|----------------|----------------|-------|-----------------|----------------|--------------|-----------|-----------|------------------|
| (Missing)                                                                            | 2              | 1              |       | 4               | 4              |              | 9         | 8         |                  |
| <b>Unplanned 30-day Readmission</b>                                                  | 6 (4.7%)       | 0 (0%)         | 0.34  | 22 (4.7%)       | 11 (4.3%)      | 0.83         | 46 (5.0%) | 27 (4.8%) | 0.898            |
| <b>Days of Surgical Hospitalization</b>                                              | 7.0 (5.0, 9.0) | 7.0 (6.0, 9.2) | 0.667 | 8.0 (6.0, 11.0) | 7.0 (5.0, 9.0) | <b>0.003</b> | 8 (6, 12) | 7 (6, 10) | <b>&lt;0.001</b> |
| (Missing)                                                                            | 11             | 4              |       | 43              | 11             |              | 80        | 53        |                  |
| <sup>1</sup> n (%); Median (IQR)                                                     |                |                |       |                 |                |              |           |           |                  |
| <sup>2</sup> Pearson's Chi-squared test; Fisher's exact test; Wilcoxon rank sum test |                |                |       |                 |                |              |           |           |                  |



eTable 4. Cox Model of Overall Survival with Interaction Effect of Preoperative Chemosensitivity and Postoperative Chemotherapy

| Characteristic                        | HR   | 95% CI      | p-value |
|---------------------------------------|------|-------------|---------|
| <b>Age (continuous)</b>               | 1.00 | 1.00 - 1.01 | 0.14    |
| <b>Year of Diagnosis (continuous)</b> | 0.94 | 0.91 - 0.97 | <0.001  |
| <b>Comorbidity</b>                    |      |             | 0.21    |
| No Comorbidity                        | —    | —           |         |
| Has Comorbidity                       | 1.11 | 0.94 - 1.30 |         |
| <b>Race</b>                           |      |             | <0.001  |
| White                                 | —    | —           |         |
| Black                                 | 0.83 | 0.67 - 1.03 |         |
| Other                                 | 0.58 | 0.44 - 0.75 |         |
| <b>Tumor Grade</b>                    |      |             | <0.001  |
| I/II                                  | —    | —           |         |
| III/IV                                | 1.59 | 1.34 - 1.90 |         |
| <b>Clinical TNM Stage</b>             |      |             | <0.001  |
| II                                    | —    | —           |         |
| III                                   | 1.63 | 1.41 - 1.90 |         |

|                                                                                        |      |             |        |
|----------------------------------------------------------------------------------------|------|-------------|--------|
| <b>Days from Chemotherapy Initiation to Surgery (continuous)</b>                       | 1.00 | 1.00 - 1.00 | 0.65   |
| <b>Days of Surgical Hospitalization (continuous)</b>                                   | 1.02 | 1.01 - 1.02 | <0.001 |
| <b># of Nodes Examined</b>                                                             |      |             | 0.001  |
| <15                                                                                    | —    | —           |        |
| =15                                                                                    | 0.76 | 0.65 - 0.89 |        |
| <b>Preoperative Chemosensitivity</b>                                                   |      |             | <0.001 |
| Refractory                                                                             | —    | —           |        |
| Sensitive                                                                              | 0.44 | 0.35 - 0.54 |        |
| Very Sensitive                                                                         | 0.08 | 0.04 - 0.18 |        |
| <b>Postoperative Chemotherapy</b>                                                      |      |             | 0.41   |
| No Chemotherapy                                                                        | —    | —           |        |
| Chemotherapy                                                                           | 0.93 | 0.79 - 1.10 |        |
| <b>Preoperative Chemosensitivity * Postoperative Chemotherapy (interaction effect)</b> |      |             | 0.033  |
| Sensitive * Chemotherapy                                                               | 0.69 | 0.47 - 1.01 |        |
| Very Sensitive * Chemotherapy                                                          | 2.63 | 0.86 - 8.06 |        |
| HR = Hazard Ratio, CI = Confidence Interval                                            |      |             |        |

eTable 5. Association of Survival in Patients Treated With Postoperative Chemotherapy or Not by yp Nodal Status

|      | Number of patients | 5 - year survival rate<br>(Chemotherapy vs. No) | Log-rank p<br>value | Cox p<br>value |
|------|--------------------|-------------------------------------------------|---------------------|----------------|
| ypCR | 172                | 80.0% vs. 90.8%                                 | 0.223               | 0.143          |
| ypN0 | 993                | 72.0% vs. 65.7%                                 | 0.051               | 0.213          |
| ypN+ | 1241               | 41.5% vs. 38.1%                                 | 0.158               | 0.078          |
